# Supplementary material for: AKR1B1 and AKR1B10 as Prognostic Biomarkers of Endometrioid Endometrial Carcinomas
Source: MDPI journal article supplement (doi:10.3390/cancers13143398), 2021-07-07
Supplement: s1 [file s1]

# AKR1B1 and AKR1B10 as Prognostic Biomarkers of Endometrioid Endometrial Carcinomas

Marko Hojnik <sup>1</sup>, Snježana Frković Grazio <sup>2</sup>, Ivan Verdenik <sup>3</sup> and Tea Lanišnik Rižner <sup>1,\*</sup>

**Supplement Table S1.** IHC data and tumor data

| Case | Carcinoma type | AKR1B1 tumor* | AKR1B10 tumor* | AKR1B1 adjacent* | AKR1B10 adjacent* | Grade** | FIGO stage |
|------|----------------|---------------|----------------|------------------|-------------------|---------|------------|
| 1    | ec             | 25.0          | 35.0           | NA               | NA                | 1       | NA         |
| 2    | ec             | 30.0          | 70.0           | 100.0            | 100               | 1       | IA         |
| 3    | ec             | 10.0          | 60.0           | NA               | NA                | 1       | NA         |
| 4    | ec             | 100.0         | 100.0          | 100.0            | 100.0             | 1       | IA         |
| 5    | ec             | 100.0         | 100.0          | 100.0            | 100.0             | 1       | IA         |
| 6    | ec             | 65.0          | 100.0          | 100.0            | 100.0             | 2       | IB         |
| 7    | ec             | 7.0           | 15.0           | NA               | NA                | 1       | IV         |
| 8    | ec             | 2.0           | 90.0           | 20.0             | 100.0             | 1       | IB         |
| 9    | ec             | 20.0          | 40.0           | NA               | NA                | 2       | NA         |
| 10   | ec             | 20.0          | 100.0          | NA               | NA                | 1       | IA         |
| 11   | ec             | .0            | 60.0           | NA               | NA                | 1       | IB         |
| 12   | ec             | 65.0          | 100.0          | NA               | NA                | 1       | IA         |
| 13   | ec             | 5.0           | 20.0           | NA               | NA                | 2       | IA         |
| 14   | ec             | 25.0          | 10.0           | NA               | NA                | 2       | IA         |
| 15   | ec             | 95.0          | 100.0          | 100.0            | 100.0             | 1       | IA         |
| 16   | ec             | 75.0          | 90.0           | NA               | NA                | 1       | IA         |
| 17   | ec             | 5.0           | 50.0           | 100.0            | 100.0             | 2       | IB         |
| 18   | ec             | 40.0          | 10.0           | 100.0            | 100.0             | 3       | IA         |
| 19   | ec             | 40.0          | 40.0           | 90.0             | 100.0             | 1       | IA         |
| 20   | ec             | 10.0          | 10.0           | 100.0            | 100.0             | 1       | IA         |
| 21   | ec             | 10.0          | 20.0           | NA               | NA                | 3       | IB         |

|    |    |       |       |       |       |   |      |
|----|----|-------|-------|-------|-------|---|------|
| 22 | ec | 70.0  | 100.0 | NA    | NA    | 3 | IB   |
| 23 | ec | 100.0 | 100.0 | 100.0 | 50.0  | 1 | IA   |
| 24 | ec | 90.0  | 100.0 | 100.0 | 100.0 | 1 | IA   |
| 25 | ec | 100.0 | 60.0  | 100.0 | 100.0 | 2 | IA   |
| 26 | ec | 90.0  | 100.0 | NA    | NA    | 1 | IA   |
| 27 | ec | 80.0  | 80.0  | 90.0  | 100.0 | 2 | IA   |
| 28 | ec | 70.0  | 75.0  | 100.0 | 100.0 | 2 | IIIA |
| 29 | ec | 95.0  | 85.0  | 50.0  | 100.0 | 1 | IA   |
| 30 | ec | 15.0  | 90.0  | 100.0 | 100.0 | 1 | IA   |
| 31 | ec | 50.0  | 30.0  | NA    | NA    | 2 | IA   |
| 32 | ec | 30.0  | 90.0  | NA    | NA    | 2 | IA   |
| 33 | ec | 100.0 | 100.0 | 100.0 | 100.0 | 3 | IA   |
| 34 | ec | 20.0  | 50.0  | 100.0 | 100.0 | 1 | IA   |
| 35 | ec | 80.0  | 100.0 | NA    | NA    | 1 | IA   |
| 36 | ec | 90.0  | 100.0 | 30.0  | 100.0 | 2 | IA   |
| 37 | ec | 70.0  | 50.0  | 70.0  | 100.0 | 1 | IA   |
| 38 | ec | 100.0 | 100.0 | 100.0 | 100.0 | 1 | IA   |
| 39 | ec | 85.0  | 70.0  | 100.0 | 100.0 | 1 | IA   |
| 40 | ec | 5.0   | 15.0  | 100.0 | 100.0 | 1 | IA   |
| 41 | ec | 5.0   | 80.0  | NA    | NA    | 1 | IA   |
| 42 | ec | 50.0  | 100.0 | NA    | NA    | 1 | IA   |
| 43 | ec | 50.0  | 100.0 | NA    | NA    | 1 | II   |
| 44 | ec | 35.0  | 100.0 | NA    | NA    | 1 | IA   |
| 45 | ec | 15.0  | 25.0  | 90.0  | 100.0 | 3 | IB   |
| 46 | ec | .0    | 60.0  | 90.0  | 100.0 | 1 | IA   |
| 47 | ec | 10.0  | 95.0  | 100.0 | 100.0 | 1 | IA   |
| 48 | ec | 20.0  | 80.0  | 50.0  | 50.0  | 2 | IB   |
| 49 | ec | 50.0  | 100.0 | NA    | NA    | 1 | IA   |

|    |    |       |       |       |       |   |      |
|----|----|-------|-------|-------|-------|---|------|
| 50 | ec | .0    | 80.0  | 80.0  | 100.0 | 2 | IA   |
| 51 | ec | 20.0  | 60.0  | NA    | NA    | 1 | IA   |
| 52 | ec | .0    | 10.0  | 70.0  | 100.0 | 2 | IB   |
| 53 | ec | .0    | 10.0  | 95.0  | 100.0 | 1 | IA   |
| 54 | ec | .0    | 40.0  | NA    | NA    | 1 | IA   |
| 55 | ec | 20.0  | 30.0  | NA    | NA    | 2 | IA   |
| 56 | ec | 15.0  | 15.0  | 99.0  | 100.0 | 1 | IA   |
| 57 | ec | .0    | 80.0  | 100.0 | 60.0  | 1 | IA   |
| 58 | ec | .0    | 15.0  | 60.0  | 80.0  | 1 | IA   |
| 59 | ec | 25.0  | 100.0 | 100.0 | 100.0 | 2 | IIIC |
| 60 | ec | 80.0  | 100.0 | 100.0 | 100.0 | 1 | IA   |
| 61 | ec | 100.0 | 100.0 | 100.0 | 100.0 | 1 | IA   |
| 62 | ec | 70.0  | 100.0 | NA    | NA    | 1 | IA   |
| 63 | ec | 5.0   | 5.0   | NA    | NA    | 2 | IB   |
| 64 | ec | 50.0  | 100.0 | NA    | NA    | 1 | IB   |
| 65 | ec | .0    | 20.0  | NA    | NA    | 2 | IA   |
| 66 | ec | 10.0  | 80.0  | NA    | NA    | 3 | IIIC |
| 67 | ec | 100.0 | 100.0 | 50.0  | 100.0 | 1 | IA   |
| 68 | ec | 100.0 | 100.0 | 100.0 | 100.0 | 3 | IB   |
| 69 | ec | 10.0  | 60.0  | 100.0 | 100.0 | 2 | IA   |
| 70 | ec | 60.0  | 90.0  | NA    | NA    | 1 | IA   |
| 71 | ec | .0    | 75.0  | 50.0  | 100.0 | 3 | IA   |
| 72 | ec | 100.0 | 100.0 | NA    | NA    | 1 | IA   |
| 73 | ec | 100.0 | 100.0 | 100.0 | 100.0 | 1 | IA   |
| 74 | ec | .0    | 15.0  | 30.0  | 90.0  | 1 | IA   |
| 75 | ec | 10.0  | 80.0  | 100.0 | 100.0 | 1 | IA   |
| 76 | ec | 5.0   | 30.0  | 90.0  | 100.0 | 2 | IA   |
| 77 | ec | 90.0  | 100.0 | NA    | NA    | 1 | IB   |

|     |    |       |       |       |       |    |      |
|-----|----|-------|-------|-------|-------|----|------|
| 78  | ec | 90.0  | 100.0 | 100.0 | 100.0 | 1  | IA   |
| 79  | ec | 30.0  | 20.0  | 100.0 | 100.0 | 3  | IA   |
| 80  | ec | 30.0  | 10.0  | NA    | NA    | 1  | IB   |
| 81  | ec | 25.0  | 85.0  | 100.0 | 100.0 | 2  | IIIA |
| 82  | ec | 25.0  | 35.0  | NA    | NA    | 1  | IA   |
| 83  | ec | 90.0  | 80.0  | 100.0 | 100.0 | 2  | IA   |
| 84  | ec | 100.0 | 5.0   | 100.0 | 50.0  | 1  | IIIA |
| 85  | ec | 100.0 | 90.0  | 100.0 | 50.0  | 2  | NA   |
| 86  | ec | 90.0  | 10.0  | 100.0 | 10.0  | 1  | IA   |
| 87  | ec | 80.0  | 25.0  | NA    | NA    | 3  | IB   |
| 88  | ec | 100.0 | 85.0  | 100.0 | 100.0 | 1  | IA   |
| 89  | ec | 100.0 | 85.0  | NA    | NA    | 1  | IA   |
| 90  | ec | 100.0 | 100.0 | NA    | NA    | 2  | IIIB |
| 91  | ec | 100.0 | 100.0 | 90.0  | 100.0 | 1  | IA   |
| 92  | ec | 100.0 | 25.0  | NA    | NA    | 1  | NA   |
| 93  | ec | 90.0  | 25.0  | 100.0 | 100.0 | 1  | IA   |
| 94  | ec | 15.0  | 10.0  | 100.0 | 100.0 | 1  | IA   |
| 95  | ec | 100.0 | 100.0 | 100.0 | 100.0 | 1  | IB   |
| 96  | ec | 100.0 | 10.0  | NA    | NA    | 1  | IA   |
| 97  | ec | 90.0  | 90.0  | 100.0 | 100.0 | 1  | IB   |
| 98  | ec | 100.0 | 100.0 | 100.0 | 100.0 | 1  | IA   |
| 99  | ec | 85.0  | 10.0  | 100.0 | 100.0 | 2  | IA   |
| 100 | ec | 100.0 | 10.0  | 100.0 | 100.0 | 3  | IB   |
| 101 | ec | 80.0  | 15.0  | NA    | NA    | 1  | IA   |
| 102 | sc | 100.0 | 95.0  | 100.0 | 100.0 | NA | IA   |
| 103 | sc | 100.0 | 100.0 | 100.0 | 100.0 | NA | IIIC |
| 104 | sc | 100.0 | 100.0 | 100.0 | 100.0 | NA | IA   |
| 105 | sc | 90.0  | 100.0 | 100.0 | 100.0 | NA | IB   |

|            |    |       |       |       |       |    |        |
|------------|----|-------|-------|-------|-------|----|--------|
| <b>106</b> | sc | 40.0  | 95.0  | NA    | NA    | NA | IB     |
| <b>107</b> | sc | 50.0  | 40.0  | NA    | NA    | NA | III C1 |
| <b>108</b> | sc | 5.0   | 10.0  | .0    | 50.0  | NA | IA     |
| <b>109</b> | sc | 50.0  | 100.0 | 95.0  | 100.0 | NA | IA     |
| <b>110</b> | sc | 40.0  | 40.0  | NA    | NA    | NA | IB     |
| <b>111</b> | sc | 25.0  | 100.0 | 100.0 | 100.0 | NA | IA     |
| <b>112</b> | sc | 100.0 | 95.0  | 100.0 | 100.0 | NA | IVB    |
| <b>113</b> | sc | 5.0   | 10.0  | 100.0 | 100.0 | NA | IVB    |

\* Percentages of immunohistochemically positive positive tumor/epithelial cells.

\*\* Serous endometrial carcinomas are by definition high grade tumors.

IHC: immunohistochemistry; ec: endometrioid endometrial cancer; sc: serous endometrial cancer;

AKR1B1: aldo-keto reductase family 1 member B1; AKR1B10: aldo-keto reductase family 1 member B10.

NA: not available.

**Supplement Table S2.** Survival data

| <b>Case</b> | <b>Event death</b> | <b>Event disease relapse</b> | <b>Survival (in years since initial diagnosis)</b> | <b>Time to relapse (in years since initial diagnosis)</b> |
|-------------|--------------------|------------------------------|----------------------------------------------------|-----------------------------------------------------------|
| 1           | no                 | no                           | 17.60                                              | 16.93                                                     |
| 2           | no                 | no                           | 17.30                                              | 16.66                                                     |
| 3           | no                 | no                           | 17.00                                              | 16.34                                                     |
| 4           | no                 | no                           | 16.80                                              | 16.16                                                     |
| 5           | no                 | no                           | 16.70                                              | 16.07                                                     |
| 6           | no                 | no                           | 16.60                                              | 15.96                                                     |
| 7           | no                 | no                           | 16.50                                              | 15.84                                                     |
| 8           | yes                | NA                           | 14.60                                              | NA                                                        |
| 9           | yes                | NA                           | 13.70                                              | NA                                                        |
| 10          | yes                | NA                           | 9.80                                               | NA                                                        |
| 11          | yes                | NA                           | 7.80                                               | NA                                                        |
| 12          | yes                | NA                           | 7.80                                               | NA                                                        |
| 13          | yes                | NA                           | 5.30                                               | NA                                                        |
| 14          | yes                | NA                           | 4.00                                               | NA                                                        |
| 15          | no                 | no                           | 15.70                                              | 15.09                                                     |
| 16          | no                 | no                           | 15.50                                              | 14.90                                                     |
| 17          | yes                | yes                          | 2.70                                               | 1.32                                                      |
| 18          | no                 | no                           | 15.30                                              | 14.67                                                     |
| 19          | yes                | NA                           | 6.30                                               | NA                                                        |
| 20          | no                 | no                           | 15.10                                              | 14.46                                                     |
| 21          | yes                | NA                           | 13.40                                              | NA                                                        |
| 22          | yes                | NA                           | 13.90                                              | NA                                                        |
| 23          | no                 | no                           | 15.10                                              | 14.45                                                     |

|    |     |    |       |       |
|----|-----|----|-------|-------|
| 24 | no  | no | 13.50 | 12.82 |
| 25 | yes | NA | 10.80 | NA    |
| 26 | no  | no | 13.40 | 12.79 |
| 27 | yes | NA | 12.30 | NA    |
| 28 | no  | no | 12.40 | 11.78 |
| 29 | no  | no | 11.80 | 11.16 |
| 30 | no  | no | 11.80 | 11.14 |
| 31 | no  | no | 11.70 | 11.03 |
| 32 | yes | no | 11.40 | 10.99 |
| 33 | yes | no | 11.40 | 10.96 |
| 34 | no  | no | 11.60 | 10.95 |
| 35 | no  | no | 11.60 | 10.91 |
| 36 | no  | no | 11.50 | 10.86 |
| 37 | yes | NA | 9.40  | NA    |
| 38 | no  | no | 10.50 | 9.83  |
| 39 | no  | no | 10.50 | 9.81  |
| 40 | no  | no | 10.50 | 9.84  |
| 41 | yes | NA | 5.30  | NA    |
| 42 | no  | no | 10.30 | 9.67  |
| 43 | no  | no | 10.20 | 9.57  |
| 44 | no  | no | 10.20 | 9.54  |
| 45 | no  | no | 10.10 | 9.50  |
| 46 | no  | no | 7.90  | 7.30  |
| 47 | no  | no | 7.90  | 7.28  |
| 48 | no  | no | 8.00  | 7.35  |
| 49 | no  | no | 7.90  | 7.26  |
| 50 | no  | no | 7.90  | 7.30  |
| 51 | no  | no | 7.90  | 7.21  |

|    |     |     |      |      |
|----|-----|-----|------|------|
| 52 | no  | no  | 7.90 | 7.23 |
| 53 | no  | no  | 7.90 | 7.21 |
| 54 | no  | no  | 7.90 | 7.21 |
| 55 | no  | no  | 7.70 | 7.07 |
| 56 | no  | no  | 7.70 | 7.02 |
| 57 | no  | no  | 7.60 | 6.95 |
| 58 | no  | no  | 7.60 | 6.99 |
| 59 | yes | NA  | 5.30 | NA   |
| 60 | no  | no  | 7.60 | 6.94 |
| 61 | no  | no  | 7.50 | 6.89 |
| 62 | no  | no  | 7.50 | 6.88 |
| 63 | no  | yes | 7.40 | 5.27 |
| 64 | no  | no  | 7.40 | 6.78 |
| 65 | no  | no  | 7.40 | 6.75 |
| 66 | no  | no  | 7.40 | 6.77 |
| 67 | no  | no  | 7.40 | 6.74 |
| 68 | no  | no  | 7.30 | 6.69 |
| 69 | no  | no  | 7.20 | 6.59 |
| 70 | no  | no  | 7.20 | 6.52 |
| 71 | no  | no  | 7.20 | 6.51 |
| 72 | no  | no  | 7.10 | 6.49 |
| 73 | no  | no  | 7.10 | 6.49 |
| 74 | no  | no  | 7.10 | 6.43 |
| 75 | no  | no  | 7.10 | 6.44 |
| 76 | no  | no  | 6.70 | 6.03 |
| 77 | no  | no  | 6.70 | 6.01 |
| 78 | no  | no  | 6.60 | 5.99 |
| 79 | no  | no  | 6.60 | 5.97 |



|     |     |     |       |       |
|-----|-----|-----|-------|-------|
| 80  | yes | no  | 6.20  | 5.92  |
| 81  | yes | NA  | .80   | NA    |
| 82  | no  | no  | 6.50  | 5.82  |
| 83  | no  | no  | 6.50  | 5.84  |
| 84  | yes | yes | 5.10  | 4.30  |
| 85  | no  | yes | 6.50  | 2.72  |
| 86  | no  | no  | 6.30  | 5.63  |
| 87  | yes | yes | .50   | .31   |
| 88  | no  | no  | 6.10  | 5.49  |
| 89  | no  | no  | 6.20  | 5.55  |
| 90  | no  | no  | 6.30  | 5.66  |
| 91  | no  | no  | 6.10  | 5.49  |
| 92  | no  | no  | 6.10  | 5.49  |
| 93  | no  | no  | 6.00  | 5.38  |
| 94  | no  | no  | 6.10  | 5.44  |
| 95  | no  | no  | 6.10  | 5.44  |
| 96  | no  | no  | 6.10  | 5.41  |
| 97  | no  | no  | 5.80  | 5.11  |
| 98  | no  | no  | 5.50  | 4.85  |
| 99  | no  | no  | 5.50  | 4.84  |
| 100 | no  | no  | 5.50  | 4.85  |
| 101 | no  | no  | 5.40  | 4.80  |
| 102 | yes | yes | 15.60 | .21   |
| 103 | yes | yes | 2.10  | 1.60  |
| 104 | no  | no  | 13.40 | 12.77 |
| 105 | yes | NA  | 8.60  | NA    |
| 106 | yes | yes | 1.00  | .72   |
| 107 | yes | yes | 1.00  | .85   |

---

|            |     |     |       |      |
|------------|-----|-----|-------|------|
| <b>108</b> | no  | no  | 10.20 | 9.55 |
| <b>109</b> | no  | no  | 7.60  | 6.95 |
| <b>110</b> | yes | yes | 1.00  | .77  |
| <b>111</b> | yes | yes | 4.20  | 3.69 |
| <b>112</b> | yes | yes | 1.90  | .90  |
| <b>113</b> | yes | yes | .40   | .32  |

---

NA: not available.

Supplement Table S3. Pathological data

| Case | Metastasis in lymph nodes | Invasion in myometrium* | Lymphovascular invasion | Invasion in cervix | Invasion in parametria |
|------|---------------------------|-------------------------|-------------------------|--------------------|------------------------|
| 1    | no                        | 1                       | yes                     | NA                 | NA                     |
| 2    | no                        | 1                       | no                      | NA                 | NA                     |
| 3    | no                        | 0                       | no                      | NA                 | NA                     |
| 4    | no                        | 0                       | no                      | NA                 | NA                     |
| 5    | no                        | 0                       | no                      | NA                 | NA                     |
| 6    | no                        | 2                       | yes                     | NA                 | NA                     |
| 7    | yes                       | 2                       | yes                     | NA                 | NA                     |
| 8    | no                        | 2                       | no                      | NA                 | NA                     |
| 9    | no                        | 1                       | yes                     | NA                 | NA                     |
| 10   | no                        | 1                       | yes                     | NA                 | NA                     |
| 11   | no                        | 1                       | yes                     | NA                 | NA                     |
| 12   | no                        | 1                       | no                      | NA                 | NA                     |
| 13   | no                        | 1                       | no                      | NA                 | NA                     |
| 14   | no                        | 1                       | no                      | NA                 | NA                     |
| 15   | no                        | 0                       | no                      | NA                 | NA                     |
| 16   | no                        | 1                       | no                      | NA                 | no                     |
| 17   | no                        | 2                       | yes                     | NA                 | NA                     |
| 18   | no                        | 0                       | no                      | NA                 | NA                     |
| 19   | no                        | 1                       | no                      | NA                 | NA                     |
| 20   | no                        | 0                       | no                      | NA                 | NA                     |
| 21   | no                        | 2                       | yes                     | NA                 | NA                     |
| 22   | no                        | 2                       | no                      | NA                 | NA                     |
| 23   | no                        | 2                       | no                      | NA                 | NA                     |
| 24   | no                        | 0                       | no                      | NA                 | NA                     |
| 25   | no                        | 1                       | yes                     | NA                 | NA                     |

|    |    |   |     |    |    |
|----|----|---|-----|----|----|
| 26 | no | 1 | yes | NA | NA |
| 27 | no | 1 | no  | NA | NA |
| 28 | no | 1 | no  | NA | NA |
| 29 | no | 1 | no  | NA | NA |
| 30 | no | 1 | no  | NA | NA |
| 31 | no | 2 | yes | NA | NA |
| 32 | no | 1 | yes | NA | NA |
| 33 | no | 1 | yes | NA | NA |
| 34 | no | 0 | no  | NA | NA |
| 35 | no | 0 | no  | NA | NA |
| 36 | no | 1 | yes | NA | NA |
| 37 | no | 0 | no  | NA | NA |
| 38 | no | 0 | no  | NA | NA |
| 39 | no | 1 | no  | NA | NA |
| 40 | no | 1 | no  | NA | NA |
| 41 | no | 1 | no  | NA | NA |
| 42 | no | 0 | no  | NA | NA |
| 43 | no | 1 | yes | NA | no |
| 44 | no | 1 | no  | NA | NA |
| 45 | no | 2 | yes | NA | NA |
| 46 | no | 1 | no  | NA | NA |
| 47 | no | 1 | no  | no | no |
| 48 | no | 2 | no  | no | no |
| 49 | no | 1 | no  | no | no |
| 50 | no | 1 | no  | NA | NA |
| 51 | no | 1 | no  | NA | NA |
| 52 | no | 2 | no  | NA | no |
| 53 | no | 1 | no  | NA | NA |

|    |     |   |     |     |     |
|----|-----|---|-----|-----|-----|
| 54 | no  | 1 | no  | no  | no  |
| 55 | no  | 1 | no  | NA  | NA  |
| 56 | no  | 1 | no  | NA  | NA  |
| 57 | no  | 1 | no  | NA  | NA  |
| 58 | no  | 1 | no  | NA  | NA  |
| 59 | yes | 2 | yes | yes | yes |
| 60 | no  | 0 | no  | no  | no  |
| 61 | no  | 0 | no  | NA  | NA  |
| 62 | no  | 0 | no  | no  | NA  |
| 63 | no  | 2 | no  | no  | no  |
| 64 | no  | 2 | yes | NA  | NA  |
| 65 | no  | 1 | no  | NA  | NA  |
| 66 | yes | 1 | no  | NA  | NA  |
| 67 | no  | 1 | no  | NA  | NA  |
| 68 | no  | 1 | no  | NA  | NA  |
| 69 | no  | 1 | no  | NA  | NA  |
| 70 | no  | 1 | no  | no  | no  |
| 71 | no  | 1 | no  | yes | no  |
| 72 | no  | 1 | no  | no  | no  |
| 73 | no  | 1 | no  | NA  | NA  |
| 74 | no  | 0 | no  | NA  | NA  |
| 75 | no  | 0 | no  | NA  | NA  |
| 76 | no  | 1 | no  | NA  | no  |
| 77 | no  | 2 | no  | NA  | NA  |
| 78 | no  | 0 | no  | NA  | no  |
| 79 | no  | 1 | no  | NA  | NA  |
| 80 | no  | 2 | yes | NA  | NA  |
| 81 | no  | 1 | no  | NA  | no  |

|     |     |   |     |     |     |
|-----|-----|---|-----|-----|-----|
| 82  | no  | 1 | no  | yes | no  |
| 83  | no  | 1 | no  | no  | no  |
| 84  | no  | 2 | no  | NA  | no  |
| 85  | no  | 2 | no  | yes | no  |
| 86  | no  | 0 | no  | yes | no  |
| 87  | yes | 2 | yes | NA  | NA  |
| 88  | no  | 0 | no  | yes | NA  |
| 89  | no  | 1 | no  | NA  | NA  |
| 90  | no  | 2 | yes | yes | yes |
| 91  | no  | 0 | no  | no  | no  |
| 92  | no  | 2 | yes | NA  | no  |
| 93  | no  | 1 | no  | NA  | no  |
| 94  | no  | 1 | no  | NA  | NA  |
| 95  | no  | 2 | no  | NA  | NA  |
| 96  | no  | 1 | no  | no  | no  |
| 97  | no  | 2 | no  | NA  | NA  |
| 98  | no  | 0 | no  | NA  | no  |
| 99  | no  | 0 | no  | no  | no  |
| 100 | no  | 2 | no  | NA  | NA  |
| 101 | no  | 1 | no  | NA  | NA  |
| 102 | no  | 1 | no  | NA  | no  |
| 103 | yes | 2 | yes | NA  | NA  |
| 104 | no  | 1 | no  | NA  | NA  |
| 105 | no  | 2 | yes | NA  | NA  |
| 106 | yes | 1 | yes | NA  | NA  |
| 107 | yes | 2 | yes | NA  | NA  |
| 108 | no  | 1 | no  | NA  | NA  |
| 109 | no  | 0 | no  | NA  | NA  |

---

|            |     |   |     |    |     |
|------------|-----|---|-----|----|-----|
| <b>110</b> | no  | 2 | yes | NA | NA  |
| <b>111</b> | no  | 1 | yes | NA | NA  |
| <b>112</b> | yes | 1 | yes | NA | NA  |
| <b>113</b> | yes | 2 | yes | NA | yes |

---

\*Invasion in myometrium; value 0: no invasion in myometrium; value 1: < 50% of the myometrial thickness; value 2: > 50% of the myometrial thickness.

NA: not available.

Supplement Table S4. Clinical data 1

| Case | Age of patient (years) | Body weight (kg) | Body height (cm) | BMI (body mass index) | Menopausal status* | Partus status (number of children) |
|------|------------------------|------------------|------------------|-----------------------|--------------------|------------------------------------|
| 1    | 51                     | NA               | NA               | NA                    | NA                 | NA                                 |
| 2    | 65                     | 97               | 170              | 34                    | 1                  | 0                                  |
| 3    | 49                     | NA               | NA               | NA                    | NA                 | NA                                 |
| 4    | 41                     | 130              | 168              | 46                    | 0                  | 1                                  |
| 5    | 53                     | 79               | 167              | 28                    | 1                  | 1                                  |
| 6    | 59                     | 68               | 165              | 25                    | 1                  | 1                                  |
| 7    | 54                     | 63               | 155              | 26                    | 1                  | 1                                  |
| 8    | 72                     | 95               | 167              | 34                    | 1                  | 1                                  |
| 9    | 63                     | NA               | NA               | NA                    | NA                 | NA                                 |
| 10   | 68                     | 83               | 162              | 32                    | 1                  | 1                                  |
| 11   | 78                     | 84               | 160              | 33                    | 1                  | 2                                  |
| 12   | 73                     | 75               | 162              | 29                    | 1                  | 1                                  |
| 13   | 75                     | 83               | 160              | 32                    | 1                  | 1                                  |
| 14   | 52                     | 70               | 160              | 27                    | 0                  | 3                                  |
| 15   | 36                     | 92               | 165              | 34                    | 0                  | 2                                  |
| 16   | 44                     | 55               | 166              | 20                    | 0                  | 1                                  |
| 17   | 68                     | 68               | 164              | 25                    | 1                  | NA                                 |
| 18   | 53                     | 65               | 168              | 23                    | 0                  | 0                                  |
| 19   | 72                     | 100              | 167              | 36                    | 1                  | 1                                  |
| 20   | 54                     | 51               | 160              | 20                    | 0                  | 2                                  |
| 21   | 68                     | 82               | 165              | 30                    | 1                  | 0                                  |
| 22   | 76                     | 85               | NA               | NA                    | 1                  | 1                                  |
| 23   | 56                     | 104              | 165              | 38                    | 1                  | 2                                  |
| 24   | 61                     | 88               | 169              | 31                    | 1                  | 2                                  |



|    |    |     |     |    |    |    |
|----|----|-----|-----|----|----|----|
| 25 | 78 | 69  | NA  | NA | 1  | 2  |
| 26 | 63 | 75  | 154 | 32 | 1  | 3  |
| 27 | 80 | 82  | 170 | 28 | 1  | 2  |
| 28 | 49 | 88  | 165 | 32 | 0  | 1  |
| 29 | 70 | 119 | 158 | 48 | 1  | 1  |
| 30 | 73 | 100 | 170 | 35 | 1  | 2  |
| 31 | 74 | 73  | 155 | 30 | 1  | 3  |
| 32 | 74 | 130 | 163 | 49 | 1  | 3  |
| 33 | 50 | 86  | NA  | NA | NA | NA |
| 34 | 54 | 95  | 158 | 38 | 1  | 4  |
| 35 | 43 | 110 | 157 | 45 | 0  | 2  |
| 36 | 68 | 87  | 158 | 35 | 1  | 2  |
| 37 | 82 | 90  | 165 | 33 | 1  | 2  |
| 38 | 58 | 102 | 165 | 38 | 1  | 1  |
| 39 | 66 | 67  | 162 | 26 | 1  | 2  |
| 40 | 66 | 93  | 164 | 35 | 1  | 1  |
| 41 | 71 | 67  | 156 | 28 | 1  | 3  |
| 42 | 44 | 79  | 165 | 29 | 0  | 2  |
| 43 | 44 | 60  | 170 | 21 | 0  | 2  |
| 44 | 71 | 80  | 165 | 29 | 1  | 2  |
| 45 | 64 | 97  | 165 | 36 | 1  | 2  |
| 46 | 75 | 75  | 163 | 28 | 1  | 4  |
| 47 | 62 | 85  | 157 | 35 | 1  | 3  |
| 48 | 61 | 94  | 169 | 33 | 0  | 0  |
| 49 | 48 | 125 | 162 | 48 | 0  | 2  |
| 50 | 72 | 90  | 168 | 32 | 1  | 2  |
| 51 | 59 | 91  | 163 | 34 | 1  | 2  |
| 52 | 70 | 72  | 166 | 26 | 1  | 1  |

|    |    |     |     |    |   |   |
|----|----|-----|-----|----|---|---|
| 53 | 63 | 95  | 168 | 34 | 1 | 2 |
| 54 | 60 | 100 | 165 | 37 | 1 | 2 |
| 55 | 55 | 84  | 158 | 34 | 1 | 2 |
| 56 | 62 | 71  | 150 | 32 | 1 | 2 |
| 57 | 72 | 65  | 164 | 24 | 1 | 2 |
| 58 | 58 | 81  | 159 | 32 | 1 | 0 |
| 59 | 57 | 79  | 163 | 30 | 1 | 2 |
| 60 | 46 | 67  | 174 | 22 | 0 | 0 |
| 61 | 67 | 56  | 165 | 21 | 1 | 2 |
| 62 | 76 | 110 | 158 | 44 | 1 | 1 |
| 63 | 63 | 100 | 163 | 38 | 1 | 2 |
| 64 | 68 | 74  | 161 | 29 | 1 | 2 |
| 65 | 80 | 60  | 156 | 25 | 1 | 2 |
| 66 | 62 | 100 | 163 | 38 | 1 | 2 |
| 67 | 63 | 107 | 162 | 41 | 1 | 3 |
| 68 | 58 | 79  | 160 | 31 | 1 | 3 |
| 69 | 64 | 80  | 163 | 30 | 1 | 2 |
| 70 | 66 | 90  | 165 | 33 | 1 | 2 |
| 71 | 73 | 99  | 158 | 40 | 1 | 0 |
| 72 | 68 | 60  | 143 | 29 | 1 | 0 |
| 73 | 56 | 58  | 164 | 22 | 1 | 2 |
| 74 | 56 | 76  | 167 | 27 | 1 | 1 |
| 75 | 75 | 79  | 164 | 29 | 1 | 2 |
| 76 | 53 | 107 | 155 | 45 | 1 | 2 |
| 77 | 69 | 91  | 154 | 38 | 1 | 0 |
| 78 | 52 | 68  | 166 | 25 | 1 | 2 |
| 79 | 71 | 65  | 162 | 25 | 1 | 3 |
| 80 | 88 | 80  | 170 | 28 | 1 | 1 |

|            |    |     |     |    |    |    |
|------------|----|-----|-----|----|----|----|
| <b>81</b>  | 58 | 78  | 163 | 29 | 1  | 2  |
| <b>82</b>  | 50 | 120 | 164 | 45 | 1  | 2  |
| <b>83</b>  | 69 | 107 | 153 | 46 | 1  | 1  |
| <b>84</b>  | 77 | 72  | 153 | 31 | 1  | 2  |
| <b>85</b>  | 70 | NA  | NA  | NA | 1  | 2  |
| <b>86</b>  | 66 | 95  | 159 | 38 | 1  | 2  |
| <b>87</b>  | 69 | 80  | 155 | 33 | 1  | 2  |
| <b>88</b>  | 76 | 67  | 155 | 28 | 1  | 2  |
| <b>89</b>  | 77 | 64  | 162 | 24 | 1  | 3  |
| <b>90</b>  | 61 | 73  | 162 | 28 | 1  | 0  |
| <b>91</b>  | 61 | 70  | 157 | 28 | 1  | 2  |
| <b>92</b>  | 59 | NA  | NA  | NA | NA | NA |
| <b>93</b>  | 65 | 68  | 158 | 27 | 1  | 2  |
| <b>94</b>  | 62 | 76  | 150 | 34 | 1  | 3  |
| <b>95</b>  | 73 | 82  | 168 | 29 | 1  | 2  |
| <b>96</b>  | 70 | 63  | 163 | 24 | 1  | 1  |
| <b>97</b>  | 74 | 115 | 167 | 41 | 1  | 0  |
| <b>98</b>  | 58 | 78  | 159 | 31 | 1  | 2  |
| <b>99</b>  | 58 | 78  | 163 | 29 | 1  | 2  |
| <b>100</b> | 68 | 64  | 155 | 27 | 1  | 1  |
| <b>101</b> | 60 | 98  | 163 | 37 | 1  | 2  |
| <b>102</b> | 49 | 75  | 164 | 28 | 1  | 3  |
| <b>103</b> | 76 | 65  | 165 | 24 | 1  | 2  |
| <b>104</b> | 70 | 80  | 165 | 29 | 1  | 2  |
| <b>105</b> | 73 | 65  | 162 | 25 | 1  | 0  |
| <b>106</b> | 58 | 60  | 176 | 19 | 1  | 2  |
| <b>107</b> | 75 | 60  | 158 | 24 | 1  | 1  |
| <b>108</b> | 47 | 94  | NA  | NA | 0  | 2  |

---

|            |    |    |     |    |   |    |
|------------|----|----|-----|----|---|----|
| <b>109</b> | 62 | 79 | 162 | 30 | 1 | 2  |
| <b>110</b> | 71 | 50 | 153 | 21 | 1 | 0  |
| <b>111</b> | 64 | 65 | 165 | 24 | 1 | 3  |
| <b>112</b> | 62 | 83 | 150 | 37 | 1 | NA |
| <b>113</b> | 64 | 99 | 160 | 39 | 1 | 2  |

---

\*Menopausal status; value 0: premenopausal patient; value 1: postmenopausal patient;  
NA: not available.

Supplement Table S5. Clinical data 2

| Case | Lymphade-<br>nectomy | R0<br>resection | Adjuvant<br>radiotherapy | Adjuvant Chemotherapy  |
|------|----------------------|-----------------|--------------------------|------------------------|
| 1    | 0                    | 1               | yes                      | 0                      |
| 2    | pelvic               | 1               | no                       | 0                      |
| 3    | pelvic               | 1               | yes                      | 0                      |
| 4    | pelvic               | 1               | no                       | 0                      |
| 5    | pelvic               | 1               | no                       | 0                      |
| 6    | pelvic               | 1               | yes                      | 0                      |
| 7    | pelvic               | 1               | yes                      | Paclitaxel/Carboplatin |
| 8    | pelvic               | 1               | no                       | 0                      |
| 9    | pelvic               | 1               | yes                      | 0                      |
| 10   | 0                    | 1               | yes                      | 0                      |
| 11   | 0                    | 1               | yes                      | 0                      |
| 12   | pelvic               | 1               | no                       | 0                      |
| 13   | pelvic               | 1               | yes                      | 0                      |
| 14   | pelvic               | 1               | no                       | 0                      |
| 15   | pelvic               | 1               | no                       | 0                      |
| 16   | pelvic               | 1               | no                       | 0                      |
| 17   | pelvic               | 1               | no                       | 0                      |
| 18   | pelvic               | 1               | yes                      | 0                      |
| 19   | pelvic               | 1               | no                       | 0                      |
| 20   | pelvic               | 1               | no                       | 0                      |
| 21   | pelvic               | 1               | yes                      | 0                      |
| 22   | pelvic               | 1               | yes                      | 0                      |
| 23   | pelvic               | 1               | yes                      | 0                      |
| 24   | pelvic               | 1               | no                       | 0                      |
| 25   | pelvic               | 1               | yes                      | 0                      |

|    |        |   |     |   |
|----|--------|---|-----|---|
| 26 | pelvic | 1 | yes | 0 |
| 27 | 0      | 1 | no  | 0 |
| 28 | pelvic | 1 | yes | 0 |
| 29 | 0      | 1 | no  | 0 |
| 30 | pelvic | 1 | no  | 0 |
| 31 | pelvic | 1 | yes | 0 |
| 32 | pelvic | 1 | yes | 0 |
| 33 | pelvic | 1 | no  | 0 |
| 34 | pelvic | 1 | no  | 0 |
| 35 | pelvic | 1 | no  | 0 |
| 36 | pelvic | 1 | yes | 0 |
| 37 | pelvic | 1 | no  | 0 |
| 38 | pelvic | 1 | no  | 0 |
| 39 | pelvic | 1 | no  | 0 |
| 40 | pelvic | 1 | no  | 0 |
| 41 | pelvic | 1 | no  | 0 |
| 42 | pelvic | 1 | no  | 0 |
| 43 | pelvic | 1 | yes | 0 |
| 44 | pelvic | 1 | yes | 0 |
| 45 | pelvic | 1 | yes | 0 |
| 46 | pelvic | 1 | no  | 0 |
| 47 | pelvic | 1 | no  | 0 |
| 48 | pelvic | 1 | no  | 0 |
| 49 | pelvic | 1 | no  | 0 |
| 50 | pelvic | 1 | no  | 0 |
| 51 | pelvic | 1 | no  | 0 |
| 52 | pelvic | 1 | yes | 0 |
| 53 | pelvic | 1 | no  | 0 |

|    |                       |   |     |                        |
|----|-----------------------|---|-----|------------------------|
| 54 | pelvic                | 1 | no  | 0                      |
| 55 | pelvic                | 1 | no  | 0                      |
| 56 | pelvic                | 1 | no  | 0                      |
| 57 | pelvic                | 1 | no  | 0                      |
| 58 | pelvic                | 1 | no  | 0                      |
| 59 | pelvic                | 1 | yes | Paclitaxel/Carboplatin |
| 60 | pelvic                | 1 | no  | 0                      |
| 61 | pelvic                | 1 | no  | 0                      |
| 62 | pelvic                | 1 | no  | 0                      |
| 63 | pelvic                | 1 | yes | 0                      |
| 64 | pelvic                | 1 | no  | 0                      |
| 65 | pelvic                | 1 | no  | 0                      |
| 66 | pelvic+para<br>aortic | 1 | yes | Paclitaxel/Carboplatin |
| 67 | pelvic                | 1 | no  | 0                      |
| 68 | pelvic+para<br>aortic | 1 | no  | 0                      |
| 69 | pelvic                | 1 | no  | 0                      |
| 70 | pelvic                | 1 | no  | 0                      |
| 71 | pelvic                | 1 | yes | 0                      |
| 72 | pelvic                | 1 | no  | 0                      |
| 73 | pelvic                | 1 | no  | 0                      |
| 74 | pelvic                | 1 | no  | 0                      |
| 75 | pelvic                | 1 | no  | 0                      |
| 76 | pelvic                | 1 | no  | 0                      |
| 77 | pelvic                | 1 | no  | 0                      |
| 78 | pelvic                | 1 | no  | 0                      |
| 79 | pelvic+para<br>aortic | 1 | no  | 0                      |

|     |                       |   |     |                        |
|-----|-----------------------|---|-----|------------------------|
| 80  | pelvic                | 1 | no  | 0                      |
| 81  | pelvic                | 1 | no  | 0                      |
| 82  | pelvic                | 1 | no  | 0                      |
| 83  | 0                     | 1 | no  | 0                      |
| 84  | 0                     | 1 | yes | 0                      |
| 85  | pelvic                | 1 | yes | 0                      |
| 86  | pelvic                | 1 | no  | 0                      |
| 87  | pelvic                | 1 | no  | Paclitaxel/Carboplatin |
| 88  | pelvic                | 1 | no  | 0                      |
| 89  | pelvic                | 1 | no  | 0                      |
| 90  | 0                     | 0 | yes | Paclitaxel/Carboplatin |
| 91  | pelvic                | 1 | no  | 0                      |
| 92  | pelvic                | 1 | no  | 0                      |
| 93  | pelvic                | 1 | no  | 0                      |
| 94  | pelvic                | 1 | no  | 0                      |
| 95  | pelvic                | 1 | no  | 0                      |
| 96  | pelvic                | 1 | no  | 0                      |
| 97  | pelvic                | 1 | no  | 0                      |
| 98  | pelvic                | 1 | no  | 0                      |
| 99  | pelvic+para<br>aortic | 1 | no  | 0                      |
| 100 | pelvic                | 1 | yes | 0                      |
| 101 | pelvic                | 1 | no  | 0                      |
| 102 | pelvic                | 0 | yes | 0                      |
| 103 | pelvic                | 0 | yes | Carboplatin            |
| 104 | pelvic                | 1 | no  | 0                      |
| 105 | pelvic                | 1 | yes | 0                      |
| 106 | pelvic                | 1 | yes | 0                      |



|            |        |   |     |                        |
|------------|--------|---|-----|------------------------|
| <b>107</b> | pelvic | 0 | no  | Paclitaxel/Carboplatin |
| <b>108</b> | pelvic | 1 | no  | 0                      |
| <b>109</b> | pelvic | 1 | no  | 0                      |
| <b>110</b> | pelvic | 1 | yes | 0                      |
| <b>111</b> | pelvic | 1 | no  | 0                      |
| <b>112</b> | pelvic | 1 | yes | Paclitaxel/Carboplatin |
| <b>113</b> | pelvic | 0 | no  | 0                      |

Resection value 1: Resection R0 achieved (no gross or microscopic tumor remains).

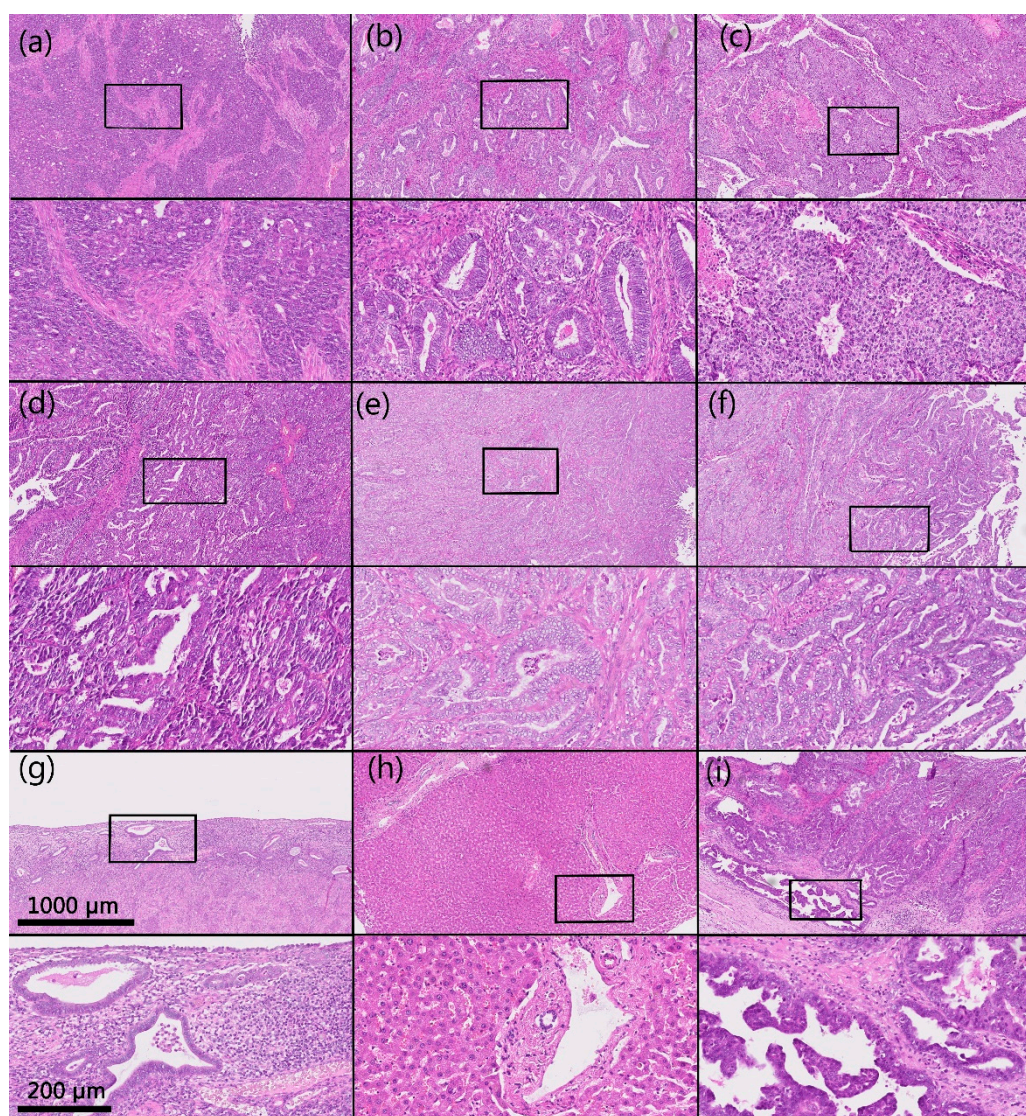

**Supplementary Figure S1.** Representative hematoxylin and eosin (HE) stained sections of the same samples as shown in Figure 2 in the main text of the manuscript.

Samples of endometrioid EC (a–c), serous EC (d–f), non-neoplastic endometrial tissue (g), control liver tissue (h) and control high grade serous ovarian cancer (i). Upper half of panels: 50× magnification; lower half of panels: the framed area from the upper half of the panel (200× magnification).



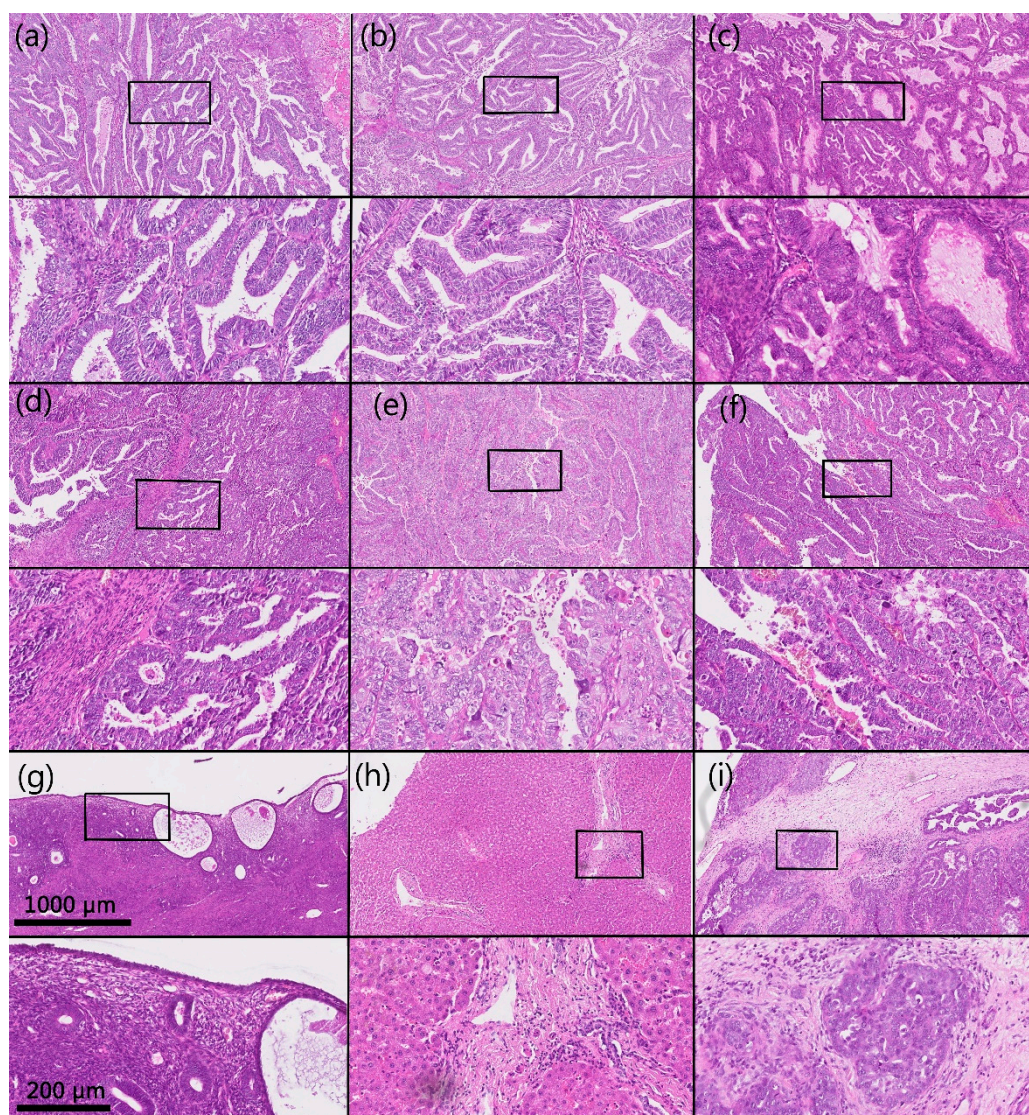

**Supplementary Figure S2.** Representative hematoxylin and eosin (HE) stained sections of same samples as shown in Figure 3 in the main text of the manuscript.

Samples of endometrioid EC (a–c), serous EC (d–f), non-neoplastic endometrial tissue (g), control liver tissue (h) and control high grade serous ovarian cancer (i). Upper half of panels: 50× magnification; lower half of panels: the framed area from the upper half of the panel (200× magnification).

**Table S6.** Survival analysis for low/ high risk endometrioid EC.

| <b>Endometrioid endometrial cancer</b>     |              |              |                           |        |
|--------------------------------------------|--------------|--------------|---------------------------|--------|
| <b>Grade 1-2 cases only,</b>               |              |              |                           |        |
| <b>Both AKR1B1 and AKR1B10 &gt; median</b> |              |              |                           |        |
|                                            | Significance | Hazard ratio | 95,0% confidence interval |        |
|                                            |              |              | Lower                     | Upper  |
| <b>Overall survival</b>                    | 0.023        | 0.096        | 0.013                     | 0.723  |
| <b>Disease free survival</b>               | 0.022        | 0.180        | 0.042                     | 0.780  |
| <b>Grade 3 cases only,</b>                 |              |              |                           |        |
| <b>Both AKR1B1 and AKR1B10 &gt; median</b> |              |              |                           |        |
| <b>Overall survival</b>                    | 0.683        | 1.518        | 0.204                     | 11.276 |
| <b>Disease free survival</b>               | 0.683        | 1.518        | 0.204                     | 11.276 |

EC: endometrial cancer

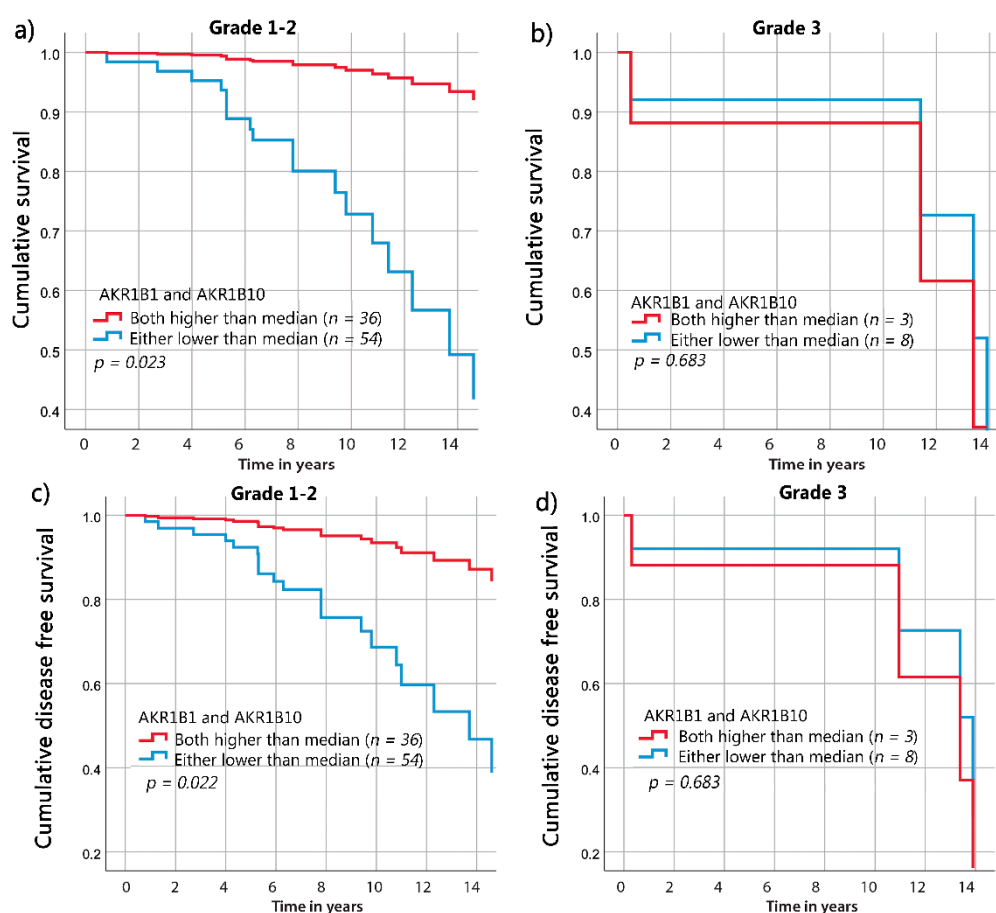

**Supplementary Figure S3.** Overall survival and disease-free survival in relation to AKR1B1 and AKR1B10 for patients with low/ high risk endometrioid EC.

One group includes cases with both AKR1B1 and AKR1B10 staining above the median values, and the other group includes cases with either AKR1B1 or AKR1B10 below the median values in endometrioid EC. Overall survival for endometrioid EC (a) grade 1-2 and (b) grade 3. Disease-free survival for endometrioid EC (c) grade 1-2 and (d) grade 3. Time on x axis represents time elapsed since initial diagnosis. AKR1B1: aldo-keto reductase family 1 member B1; AKR1B10: aldo-keto reductase family 1 member B10; EC: endometrial cancer.

**Supplement Table S7.** Survival analysis for FIGO I-II stage and for FIGO III-IV ECEndometrioid endometrial cancer**FIGO I-II stage cases only,****Both AKR1B1 and AKR1B10 > median**

95,0% confidence interval

|                              | Significance | Hazard ratio | Lower | Upper |
|------------------------------|--------------|--------------|-------|-------|
| <b>Overall survival</b>      | 0.020        | 0.224        | 0.064 | 0.791 |
| <b>Disease free survival</b> | 0.014        | 0.209        | 0.060 | 0.729 |

**FIGO III-IV cases only,****Both AKR1B1 and AKR1B10 > median**

|                              |       |       |       |       |
|------------------------------|-------|-------|-------|-------|
| <b>Overall survival</b>      | 0.621 | 0.037 | 0.000 | 17396 |
| <b>Disease free survival</b> | 0.621 | 0.037 | 0.000 | 17396 |

EC: endometrial cancer

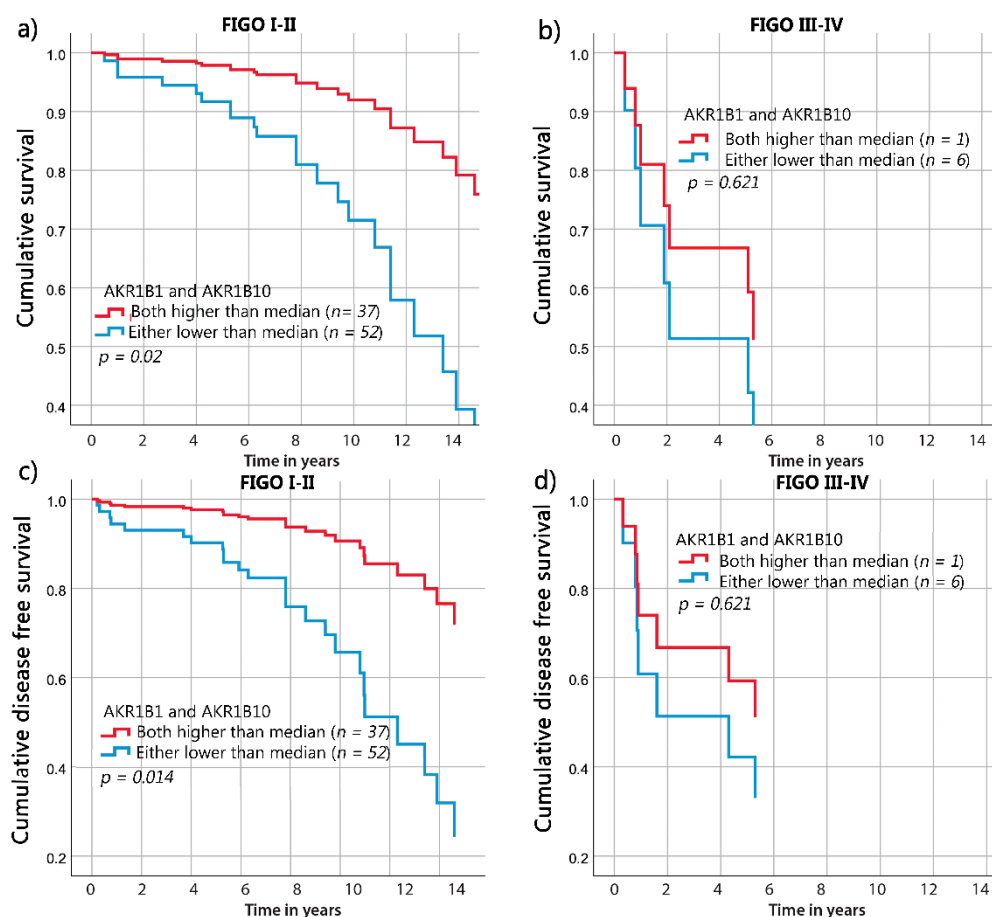

**Supplementary Figure S4.** Overall survival and disease-free survival in relation to AKR1B1 and AKR1B10 for patients with FIGO I-II/ FIGO III-IV disease.

One group includes cases with both AKR1B1 and AKR1B10 staining above the median values, and the other group includes cases with either AKR1B1 or AKR1B10 below the median values in endometrioid EC. Overall survival for endometrioid EC (a) FIGO I-II and (b) FIGO III-IV. Disease-free survival for endometrioid EC (c) FIGO I-II and (d) FIGO III-IV. Time on x axis represents time elapsed since initial diagnosis. AKR1B1: aldo-keto reductase family 1 member B1; AKR1B10: aldo-keto reductase family 1 member B10; EC: endometrial cancer.

**Table S8.** Associations between clinical and histopathological data and AKR1B1 and AKR1B10 immunohistochemical levels in patients with EC - part 1.

|                                | AKR1B1 < median | AKR1B10 > median | AKR1B10 < median | AKR1B10 > median |
|--------------------------------|-----------------|------------------|------------------|------------------|
| <b>Endometrioid EC</b>         |                 |                  |                  |                  |
| <b>Grade III</b>               | 6/53 (11%)      | 5/48 (10%)       | 8/56 (14%)       | 3/45 (7%)        |
| <b>Lymphovascular invasion</b> | 14/53 (26%)     | 8/48 (17%)       | 12/56 (21%)      | 10/45 (22%)      |
| <b>Lymph node invasion</b>     | 3/53 (6%)       | 1/48 (2%)        | 3/56 (5%)        | 1/45 (2%)        |
| <b>Cervical invasion</b>       | 3/8 (38%)       | 4/12 (33%)       | 3/9 (33%)        | 4/11 (36%)       |
| <b>Parametrial invasion</b>    | 1/12 (8%)       | 1/16 (6%)        | 0/14 (0%)        | 2/14 (14%)       |
| <b>Menopausal status</b>       | 43/50 (86%)     | 40/46 (87%)      | 47/52 (90%)      | 36/44 (82%)      |
| <b>Parous status</b>           | 43/53 (81%)     | 41/48 (85%)      | 45/56 (80%)      | 39/45 (87%)      |
| <b>Smoking status</b>          | 4/28 (14%)      | 1/26 (4%)        | 5/32 (16%)       | 0/22 (0%)        |
| <b>Myometrial invasion</b>     | 12/53 (23%)     | 12/48 (25%)      | 13/56 (23%)      | 11/45 (24%)      |
| <b>Weight (mean SD)</b>        | 84.3 (16.6)     | 82.9 (18.1)      | 82.1 (14.7)      | 85.4 (19.8)      |
| <b>Height (mean SD)</b>        | 162 (4.9)       | 161 (5.8)        | 162 (5.2)        | 163 (5.5)        |
| <b>BMI (mean SD)</b>           | 32.0 (6.2)      | 31.9 (7.2)       | 31.6 (5.6)       | 32.4 (7.8)       |
| <b>Age (mean SD)</b>           | 63.7 (9.7)      | 63.3 (10.9)      | 65.2 (9.3)       | 61.4 (11.1)      |
| <b>Serous EC</b>               |                 |                  |                  |                  |
| <b>Grade III</b>               | 7/0 (100%)      | 5/0 (100%)       | 7/0 (100%)       | 5/0 (100%)       |
| <b>Lymphovascular invasion</b> | 5/7 (71%)       | 3/5 (60%)        | 5/7 (71%)        | 3/5 (60%)        |
| <b>Lymph node invasion</b>     | 3/7 (43%)       | 2/5 (40%)        | 4/7 (57%)        | 1/5 (20%)        |
| <b>Parametrial invasion</b>    | 1/1 (100%)      | 0/1 (0%)         | 1/2 (50%)        | 1/2 (50%)        |
| <b>Menopausal status</b>       | 6/7 (86%)       | 5/5 (100%)       | 6/7 (86%)        | 5/5 (100%)       |
| <b>Parous status</b>           | 6/7 (86%)       | 3/5 (60%)        | 5/7 (71%)        | 4/5 (80%)        |
| <b>Smoking status</b>          | 4/0 (100%)      | 1/0 (100%)       | 3/0 (100%)       | 2/0 (100%)       |
| <b>Weight (mean SD)</b>        | 72.4 (18.6)     | 73.6 (8.4)       | 74.4 (18.6)      | 70.8 (8.0)       |
| <b>Height (mean SD)</b>        | 162 (7.8)       | 161 (6.4)        | 160 (9.2)        | 164 (1.6)        |
| <b>BMI (mean SD)</b>           | 26.3 (7.1)      | 28.6 (5.2)       | 28.1 (8.1)       | 26.4 (3.1)       |
| <b>Age (mean SD)</b>           | 63.0 (9.1)      | 66.0 (10.8)      | 60.9 (10.4)      | 69.0 (5.9)       |

None of the clinicopathological parameters differs statistically significantly between values <median or >median of AKR1B1 or AKR1B10. There were some missing data (cervical invasion, parametrial invasion, smoking).

EC: endometrioid cancer; SD: standard deviation; BMI: body mass index; AKR1B1: aldo-keto reductase family 1 member B1; AKR1B10: aldo-keto reductase family 1 member B10.



**Supplement Table S9. Associations between clinical and histopathological data and AKR1B1 and AKR1B10 immunohistochemical levels in patients with EC – part 2.**

|                               | Both AKR1B1 or AKR1B10<br>< median | Both AKR1B1 and AKR1B10<br>> median |
|-------------------------------|------------------------------------|-------------------------------------|
| <b><u>Endometrioid EC</u></b> |                                    |                                     |
| Grade III                     | 8/68 (12%)                         | 3/33 (9%)                           |
| Lymphovascular invasion       | 17/68 (25%)                        | 5/33 (15%)                          |
| Lymph node invasion           | 4/68 (6%)                          | 0/33 (0%)                           |
| Cervical invasion             | 4/12 (33%)                         | 3/8 (38%)                           |
| Parametrial invasion          | 1/19 (5%)                          | 1/9 (11%)                           |
| Menopausal status             | 56/64 (88%)                        | 27/32 (84%)                         |
| Parous status                 | 57/68 (84%)                        | 27/33 (82%)                         |
| Smoking status                | 5/37 (14%)                         | 0/17 (0%)                           |
| Myometrial invasion           | 16/68 (24%)                        | 8/33 (24%)                          |
| Weight (mean SD)              | 83.4 (16.0)                        | 84.1 (19.7)                         |
| Height (mean SD)              | 162 (5.0)                          | 162 (6.0)                           |
| BMI (mean SD)                 | 31.9 (6.1)                         | 32.1 (7.8)                          |
| Age (mean SD)                 | 64.5 (9.7)                         | 61.3 (11.2)                         |
| <b><u>Serous EC</u></b>       |                                    |                                     |
| Lymphovascular invasion       | 6/9 (67%)                          | 2/3 (67%)                           |
| Lymph node invasion           | 4/9 (44%)                          | 1/3 (33%)                           |
| Parametrial invasion          | 1/2 (50%)                          | 1/2 (50%)                           |
| Menopausal status             | 8/9 (89%)                          | 3/3 (100%)                          |
| Parous status                 | 7/9 (78%)                          | 2/3 (67%)                           |
| Smoking status                | 0/5 (0%)                           | 0/0 (0%)                            |
| Weight (mean SD)              | 73.9 (16.5)                        | 70.0 (8.7)                          |
| Height (mean SD)              | 161 (7.9)                          | 164 (1.7)                           |
| BMI (mean SD)                 | 27.8 (7.1)                         | 26.0 (2.9)                          |
| Age (mean SD)                 | 61.3 (9.1)                         | 73.0 (3.0)                          |

None of the clinicopathological parameters differs statistically significantly between values <median or >median of AKR1B1 or AKR1B10. There were some missing data (cervical invasion, parametrial invasion, smoking).

EC: endometrioid cancer; SD: standard deviation; BMI: body mass index; AKR1B1: aldo-keto reductase family 1 member B1; AKR1B10: aldo-keto reductase family 1 member B10.
